# Supplementary material for: Maleimide Self-Reaction in Furan/Maleimide-Based Reversibly Crosslinked Polyketones: Processing Limitation or Potential Advantage?
Source: MDPI journal article supplement (doi:10.3390/molecules26082230), 2021-04-13
Supplement: s1 [file s1]

*Supplementary figures*

# Maleimide self-reaction in furan/maleimide-based reversibly crosslinked polyketones: Processing limitation or potential advantage?

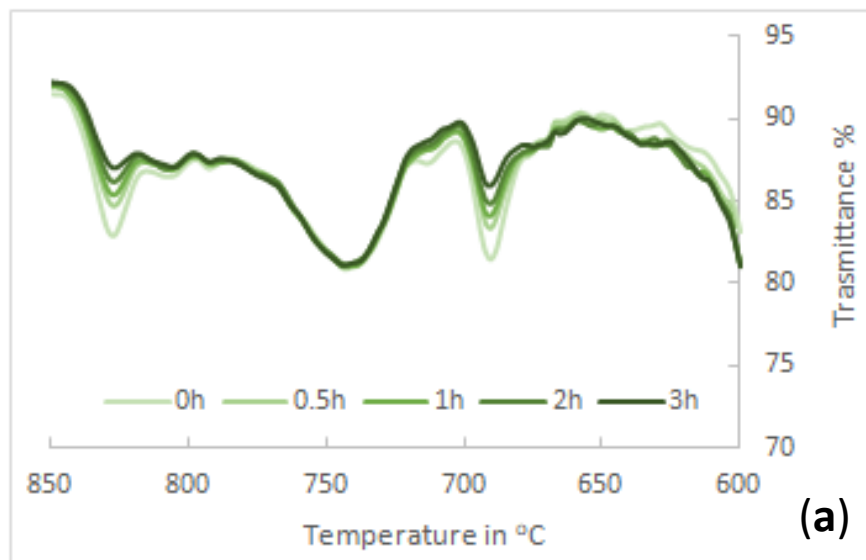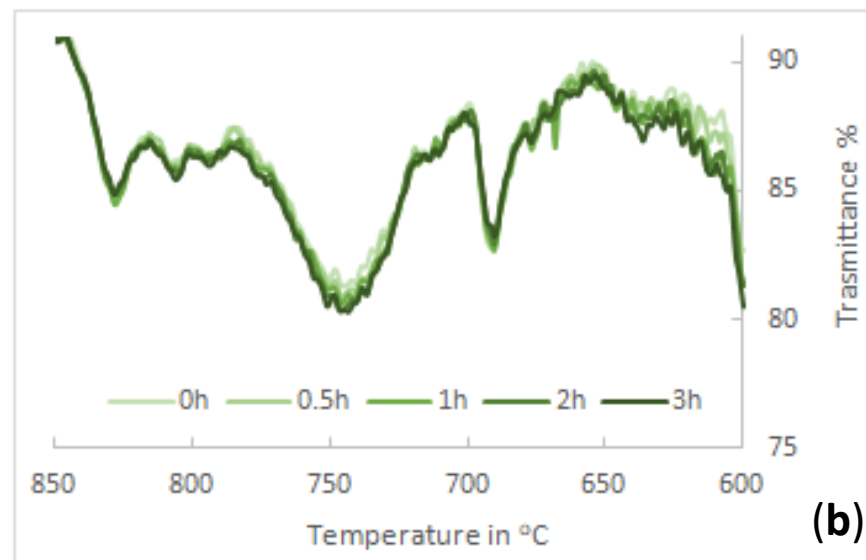

**Figure S1.** FTIR measurements for the FM-TRCP performed at (a) 150 °C and (b) 120 °C.

*Supplementary figures*

## Maleimide self-reaction in furan/maleimide-based reversibly crosslinked polyketones: Processing limitation or potential advantage?

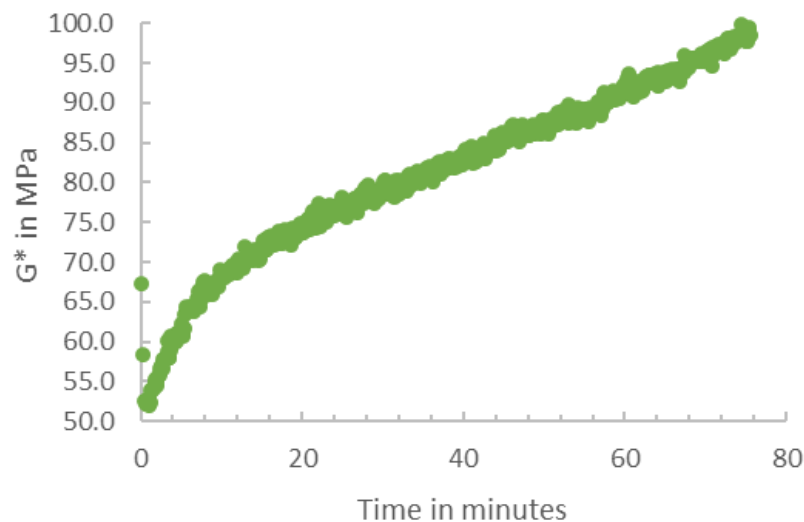

**Figure S2.** Increasing complex modulus of MDP-BMI at 150 °C.

Supplementary figures

# Maleimide self-reaction in furan/maleimide-based reversibly crosslinked polyketones: Processing limitation or potential advantage?

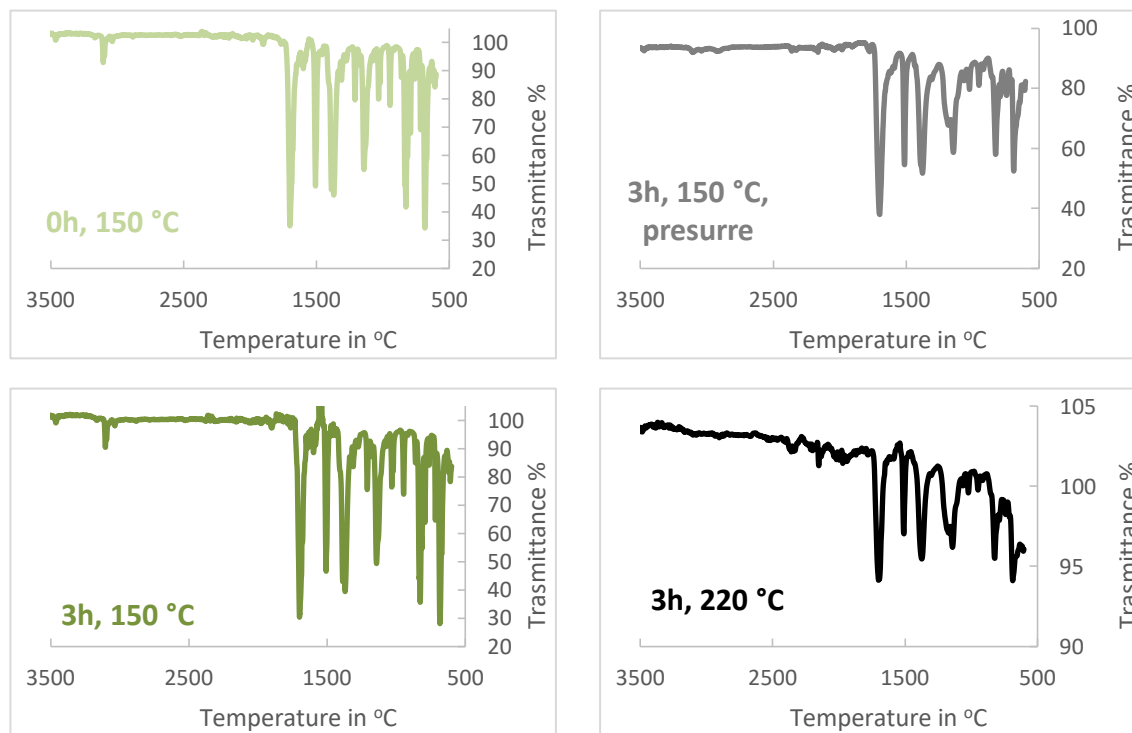

**Figure S3.** FTIR full spectra of MDP-BMI before and after 3 hours at 150 °C, after being in a press for 3 hours at 150 °C (4MPa), and after 3 hours at 220 °C.

Supplementary figures

# Maleimide self-reaction in furan/maleimide-based reversibly crosslinked polyketones: Processing limitation or potential advantage?

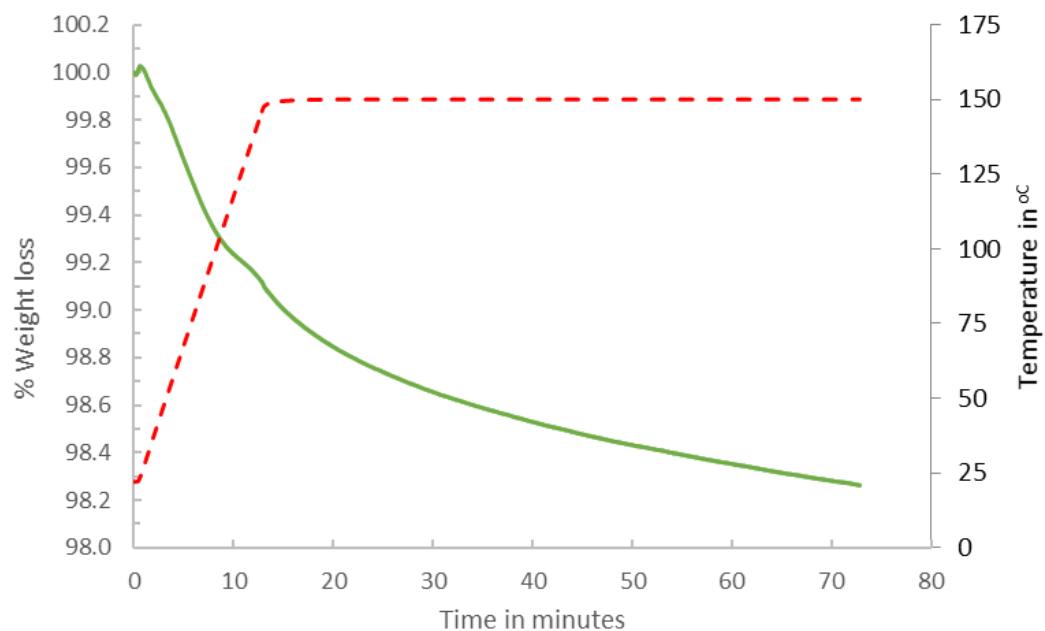

**Figure S4.** Thermo-gravimetric analysis of the polymer (weight loss percentage in green solid line and temperature in red dashed lines).

Supplementary figures

# Maleimide self-reaction in furan/maleimide-based reversibly crosslinked polyketones: Processing limitation or potential advantage?

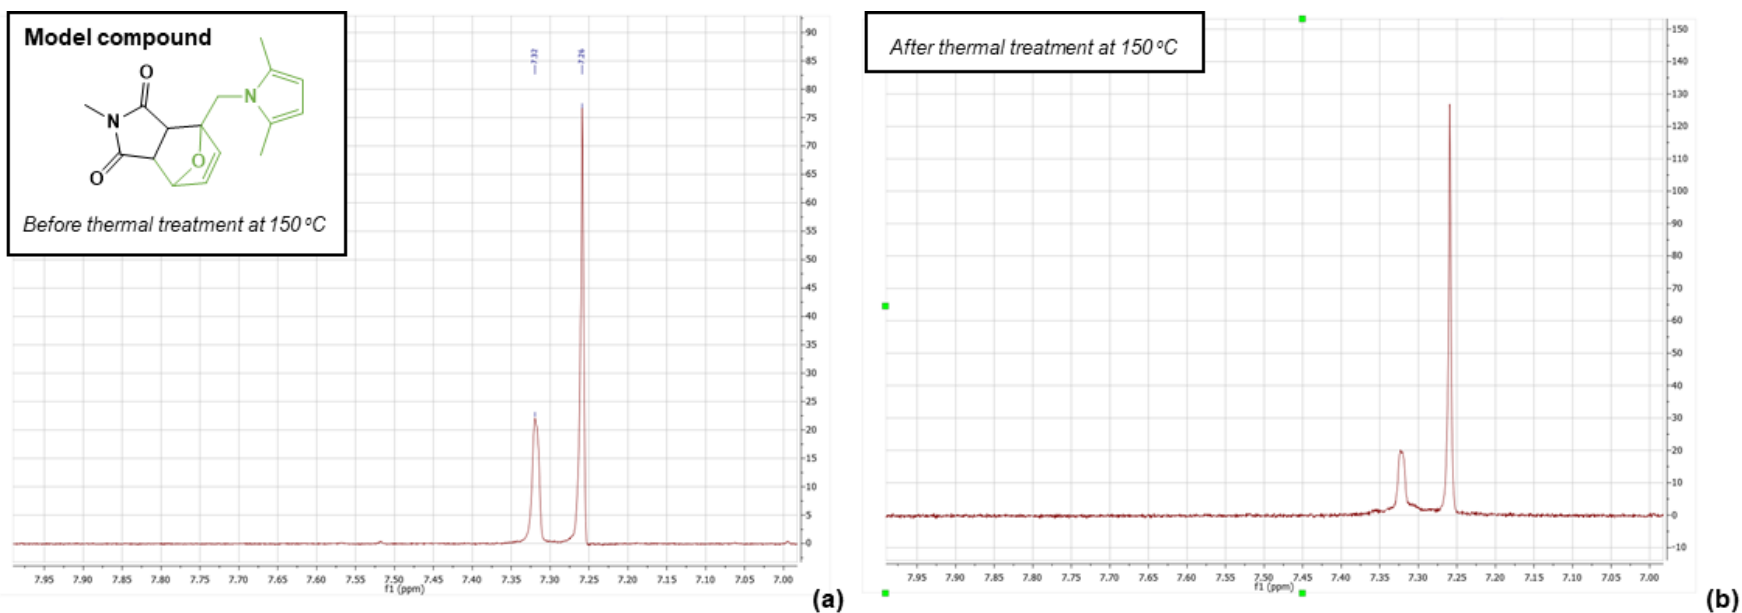

**Figure S5.**  $^1\text{H-NMR}$  from 8 to 7 ppm of the model compound (a) before and (b) after the thermal treatment at  $150\text{ }^\circ\text{C}$ .
